1  
2  
3  
4  
5  
6  
7  
8  
9  
10  
11  
12  
13  
14  
15  
16  
17  
18  
19  
20

Reliability and validity of clinical tests of cardiorespiratory fitness: A systematic review and meta-analysis

Samuel Harkin<sup>1,2¶\*</sup>, Stephen Cousins<sup>1¶</sup>, Simon Locke<sup>1,3¶</sup>, Brett Gordon<sup>1¶</sup>

<sup>1</sup> Holsworth Research Initiative, La Trobe Rural Health School, La Trobe University, Bendigo, Victoria, Australia.

<sup>2</sup> Sportsmed Biologic, Box Hill, Victoria, Australia

<sup>3</sup> Bendigo Orthopaedic and Sports Medicine, Bendigo, Victoria Australia

\* Corresponding author  
E-mail: [drsamharkin@gmail.com](mailto:drsamharkin@gmail.com) (SH)

¶ These authors contributed equally to this work

NOTE: This preprint reports new research that has not been certified by peer review and should not be used to guide clinical practice.

## 21 **Abstract**

### 22 **Introduction:**

23 Insufficient physical activity is a significant contributor to non-communicable disease  
24 amongst the global population. Insufficient physical activity is directly linked with reduced  
25 cardiorespiratory fitness (CRF). CRF is as strong a predictor of mortality as well-established  
26 risk-factors such as smoking, hypertension, dyslipidaemia, and type 2 diabetes mellitus,  
27 however, it remains the only major risk factor not routinely assessed in primary health care  
28 settings. The aim of this review was to assess the validity and reliability of existing  
29 submaximal tests of CRF which can be employed in a standard medical consultation for the  
30 estimation of CRF and physical function in adults.

### 31 **Methods:**

32 A systematic review of the scientific literature was undertaken to find all studies reporting  
33 the reliability and/or validity of submaximal tests of CRF and physical function. Studies  
34 published up to 12 January 2023 were included in the search of the Medline, Embase,  
35 Cinahl, SPORTdiscus, Cochrane library, Informit Health and Web of Science databases. Risk  
36 of bias was assessed using the JBI critical appraisal checklist for analytical cross-sectional  
37 studies. Data including reliability of the submaximal protocols as measured by test-retest  
38 Pearson's  $r$  ( $r$ ) or Intraclass co-efficient (ICC); and validity as measured by the correlation  
39 between the submaximal protocol results and the graded exercise test results ( $r$ ) was  
40 extracted. Meta-analyses were performed to determine the overall mean  $r$  of the  
41 correlation coefficients.

42

43 **Results:**

44 In total 1754 studies were identified. Following screening, 143 studies including 15,760  
45 participants were included. All clinical tests included in meta-analysis demonstrated strong  
46 reliability. The Siconolfi step test ( $r=0.81$ ), Incremental shuttle walk test ( $r=0.768$ ) and 1-  
47 minute sit-to-stand test ( $r=0.65$ ) demonstrated strongest validity following meta-analysis.

48 **Conclusion:** Based on the validity of the tests outlined, these can be used as an acceptable  
49 method of estimating VO<sub>2</sub>peak in a broad population, without the cost and access issues of  
50 formal GXT.

51

52

## 53 **1. Introduction**

54 Insufficient physical activity is a significant contributor to non-communicable disease  
55 amongst the global population, including obesity, many types of cancer, metabolic syndrome  
56 and cardiovascular disease, as well as all-cause mortality (1). In Australia, two thirds of adults  
57 report as overweight or obese and over half of Australian adults do not participate in  
58 sufficient physical activity to meet the Australian government's recommended *Physical*  
59 *Activity and Sedentary Behaviour Guidelines for Adults* (2, 3). The economic cost of physical  
60 inactivity to the Australian health system is estimated at around \$850 million annually,  
61 accounting for between 38,400 and 174,000 disability adjusted life years (DALYs) per year (4).

62

63 Insufficient physical activity is directly linked with reduced cardiorespiratory fitness (CRF) and  
64 reduced physical function (1, 5). Those with low cardiorespiratory fitness face a 70% higher  
65 risk of all-cause mortality and a 56% greater risk of cardiovascular disease mortality (5). CRF  
66 is as strong a predictor of mortality as well-established risk-factors such as cigarette smoking,  
67 hypertension, high cholesterol, and type 2 diabetes mellitus (T2DM) (6). Evidently,  
68 measurement of CRF and tracking of progress towards improving CRF should become a  
69 standard part of clinical consultations, as is standard of care with hypertension, dyslipidaemia,  
70 diabetes monitoring and smoking cessation (6).

71

72 Whilst the cost of inactivity is high, there is significant potential for improvement across global  
73 populations. CRF can be measured directly via graded exercise testing (GXT) and expressed as

74 maximal oxygen consumption (VO<sub>2</sub>max), or estimated from peak work rate achieved in GXT  
75 (VO<sub>2</sub>peak) or through submaximal testing via algorithm or correlation. Oxygen consumption  
76 can be converted to metabolic equivalents (MET), with most activities having an estimated  
77 MET value(7). There is no 'lower threshold' for the relative risk reduction benefit of regular  
78 exercise (1). For example, a 20% reduction in mortality attributable to cardiac causes is  
79 observed for every 1-MET increase in exercise capacity (8). Incidence of falls can be reduced  
80 by more than 50% with simple exercise interventions (9). To date, to our knowledge, no study  
81 has assessed the validity and reliability of submaximal testing that can be performed in a  
82 standard medical consultation, limiting the utility of CRF within clinical consultations.

83

84 CRF is recognised as an important marker of functional ability and cardiovascular health;  
85 however, it remains the only major risk factor not routinely assessed or regularly monitored  
86 in primary health care settings (10). The direct assessment of cardiorespiratory fitness via  
87 maximal testing is costly, requires equipment and trained personnel, as well as demanding a  
88 maximal effort which is frequently unattained in non-athletic participants (11, 12).  
89 Consequently, a large number of submaximal exercise protocols have been developed,  
90 involving stationary cycling, running, walking, arm ergometry and stepping; however, time,  
91 space or equipment requirements deem many inappropriate for regular medical clinical utility  
92 ((12)). Regular and routine clinical testing of physical function and CRF would allow clinicians  
93 to determine the CRF and functional capacity of their patients to aid in exercise prescription  
94 and counselling, whilst providing the patient with motivation and accountability to improve  
95 their health outcomes.

96

97 The aim of this review was to assess the validity and reliability of existing submaximal tests of  
98 CRF which can be employed in a standard medical consultation for the estimation of CRF and  
99 physical function.

100

101

## 102 **2. Methods**

### 103 **2.1 Review Strategy**

104 A systematic review of the scientific literature was undertaken to find all studies reporting  
105 the reliability and/or validity of submaximal tests of CRF and physical function. The study was  
106 registered with Prospero registration CRD42022368963 and protocol can be accessed via  
107 [https://www.crd.york.ac.uk/prospero/display\\_record.php?RecordID=368963](https://www.crd.york.ac.uk/prospero/display_record.php?RecordID=368963). Studies  
108 published up to 12 January 2023 were included in the search of the Medline, Embase, Cinahl,  
109 SPORTdiscus, Cochrane library, Informit Health and Web of Science databases . The broad  
110 search strategy involved the following terms, limited to English language: ‘Physical function  
111 test’ OR ‘exercise test’ OR ‘graded exercise test’ OR ‘GXT’ OR ‘fitness test’ OR ‘squat test’ OR  
112 ‘sit to stand’ OR ‘step test’ AND ‘exercise tolerance’ OR ‘exercise capacity’ OR  
113 ‘cardiorespiratory fitness’ OR ‘aerobic fitness’ OR ‘aerobic capacity’ OR ‘time to fatigue’ AND  
114 ‘validity’ OR ‘valid’ OR ‘reliable’ OR ‘reliability’.

115

### 116 **2.2 Eligibility criteria**

117 Eligible studies met the following inclusion criteria: (1) English language; (2) published any  
118 time from database establishment until 12 January 2023; (3) investigating a clinical test of  
119 physical function in (4) participants 18 years of age or older. In order to ensure that studies  
120 relevant to the aim of this review were analysed, particularly with regards to tests applicable  
121 in a clinical setting, studies were excluded on the following basis: (1) Study type - case reports,  
122 not original research, not in English language, conference proceedings; (2) *Clinical* test –  
123 equipment requirement beyond scope of that available in a standard Australian medical clinic  
124 (e.g. a step, chair or stopwatch), duration greater than ten minutes to administer, expense or  
125 technical expertise required to administer; (3) Validity and reliability descriptors – no relevant  
126 statistical analysis; (4) Outcomes of interest – no mention of one or more of heart rate, time  
127 to fatigue, VO<sub>2</sub> peak, VO<sub>2</sub> max, METs, number of repetitions.

128

## 129 **2.3 Study selection**

130 Studies were selected based on the predetermined inclusion and exclusion criteria.  
131 Assessment of study eligibility was performed using Covidence systematic review software  
132 (Veritas Health Innovation, Melbourne, Australia, available at [www.covidence.org](http://www.covidence.org)) and  
133 conducted independently by two reviewers. Studies were excluded based on title and  
134 abstract and the reason for exclusion was recorded, with any disagreement resolved by a  
135 third reviewer. Full texts of the remaining studies were assessed by two reviewers, with all  
136 authors discussing any disagreements to achieve a consensus view.

137

## 138 **2.4 Data extraction**

139 One author extracted all relevant data from included studies using a standardised form, with  
140 quality control performed on a random sample of 10 papers by two other reviewers. Data  
141 extracted included author, year and location of publication; population studied including  
142 mean age(standard deviation)[SD], gender split, BMI(SD) and medical condition (where  
143 relevant to the study) of participants; inclusion and exclusion criteria; sub-maximal protocol  
144 undertaken; graded exercise test undertaken; reliability and validity statistics; and other  
145 outcome measures of note (HR, VO<sub>2</sub>peak, RPE, 6MWD, sit-to-stand repetitions). The primary  
146 outcomes of interest were reliability of the submaximal protocols as measured by test-retest  
147 Pearson's  $r$  ( $r$ ) or Intraclass co-efficient (ICC); and validity as measured by the correlation  
148 between the submaximal protocol results and the graded exercise test results ( $r$ ).

149

## 150 **2.5 Risk of bias assessment**

151 The risk of bias of included studies was assessed using the JBI critical appraisal checklist for  
152 analytical cross sectional studies (JBIC) (13). This checklist assesses specific domains of the  
153 studies to determine the potential risk of bias that can be answered with yes, no, or unclear.  
154 If the answer was yes, the question was assigned a score of 1. If the answer was no, unclear,  
155 or not applicable, it was assigned a score of 0. Studies with a score of 7-8 were deemed low  
156 risk of bias, 4-6 moderate and 0-3 high. No studies were excluded on the basis of risk of bias  
157 assessment.

158

## 159 **2.6 Data synthesis**



160 Meta-analyses were performed to determine the overall mean  $r$  of the correlation  
161 coefficients. Data including reliability of the submaximal protocols as measured by test-retest  
162 Pearson's  $r$  ( $r$ ) or Intraclass co-efficient (ICC); and validity as measured by the correlation  
163 between the submaximal protocol results and the graded exercise test results ( $r$ ), was pooled  
164 using a random-effects model. Jamovi Version 2.2 (Computer Software retrieved from  
165 <https://www.jamovi.org>) was used for statistical analysis.

166

## 167 **3. Results**

### 168 **3.1 Paper identification**

169 In total 1754 studies (title and abstract) were identified following deletion of duplicates  
170 ( $n=80$ ). Following screening, 1466 were excluded, with 283 full texts obtained for further  
171 eligibility assessment. 143 full-text papers were included for review (*Figure 1*).

172 **Fig 1: PRISMA diagram of included studies**

### 173 **3.2 Sub-maximal test characteristics**

174 The 143 included papers studied 49 different clinical tests of physical function. 75 studies  
175 assessed the 6-minute walk test (6MWT) (14, 15, 16, 17, 18, 19, 20, 21, 22, 23, 24, 25, 26, 27,  
176 28, 29, 30, 31, 32, 33, 34, 35, 36, 37, 38, 39, 40, 41, 42, 43, 44, 45, 46, 47, 48, 49, 50, 51, 52,  
177 53, 54, 55, 56, 57, 58, 59, 60, 61, 62, 63, 64, 65, 66, 67, 68, 69, 70, 71, 72, 73, 74, 75, 76, 77,  
178 78, 79, 80, 81, 82, 83, 84, 85, 86, 87). Fifteen studies analysed the incremental shuttle walk  
179 test (ISWT) (18, 37, 56, 58, 68, 88, 89, 90, 91, 92, 93, 94, 95, 96, 97). The 1-minute sit to  
180 stand(1mSTS) was studied in eight papers, the 6-minute step test (6MST) in seven, 'timed up

181 and go test' (TUGT) in six, and the Siconolfi step test (SST) in five (70, 80, 86, 87, 98, 99, 100,  
182 101, 102, 103, 104, 105, 106, 107, 108, 109, 110, 111, 112, 113, 114). Seven tests were studied  
183 in three papers, five tests were studied twice and fifty once. A degree of heterogeneity existed  
184 amongst the exact test protocols for many of the clinical tests described by the same name,  
185 however they were extracted as named by the authors.

186

### 187 **3.3 Graded exercise test characteristics**

188 A graded exercise test was included in 71 of the 143 studies included. Of these, 38 included a  
189 cycle ergometry based graded exercise test, with one additional study recumbent cycle  
190 ergometry. There were 32 treadmill based graded exercise tests included.

191

### 192 **3.4 Quality assessment**

193 Table 1 provides a summary of how each individual paper rated per the JBI critical appraisal  
194 checklist. Fifty (34.9%) included studies scored 7 or 8 to be deemed low risk of bias. Eighty-  
195 three (58.2%) had a moderate risk, and 10 (6.9%) high risk of bias.

| Study ID       | Q1  | Q2  | Q3  | Q4  | Q5  | Q6  | Q7  | Q8  | Total |
|----------------|-----|-----|-----|-----|-----|-----|-----|-----|-------|
| Cheng 2020     | Yes | Yes | Yes | Yes | Yes | Yes | Yes | Yes | 8     |
| Barbosa 2022   | Yes | Yes | Yes | Yes | Yes | Yes | Yes | Yes | 8     |
| Cooney 2011    | Yes | Yes | Yes | Yes | Yes | Yes | Yes | Yes | 8     |
| Cooney 2013    | Yes | Yes | Yes | Yes | Yes | Yes | Yes | Yes | 8     |
| Crook 2017     | Yes | Yes | Yes | Yes | Yes | Yes | Yes | Yes | 8     |
| DeCamargo 2013 | Yes | Yes | Yes | Yes | Yes | Yes | Yes | Yes | 8     |
| Bonnevie 2019  | Yes | Yes | Yes | Yes | Yes | Yes | Yes | Yes | 8     |
| Brinklov 2016  | Yes | Yes | Yes | Yes | Yes | Yes | Yes | Yes | 8     |
| Granger 2015   | Yes | Yes | Yes | Yes | Yes | Yes | Yes | Yes | 8     |
| Reed 2020      | Yes | Yes | Yes | Yes | Yes | Yes | Yes | Yes | 8     |

|                          |     |     |     |         |     |     |     |     |   |
|--------------------------|-----|-----|-----|---------|-----|-----|-----|-----|---|
| Grosbois 2016            | Yes | Yes | Yes | Yes     | Yes | Yes | Yes | Yes | 8 |
| Guazzi 2009              | Yes | Yes | Yes | Yes     | Yes | Yes | Yes | Yes | 8 |
| Hansen 2018              | Yes | Yes | Yes | Yes     | Yes | Yes | Yes | Yes | 8 |
| Maldonado-Martin 2006    | Yes | Yes | Yes | Yes     | Yes | Yes | Yes | Yes | 8 |
| Manali 2010              | Yes | Yes | Yes | Yes     | Yes | Yes | Yes | Yes | 8 |
| Shulman 2019             | Yes | Yes | Yes | Yes     | Yes | Yes | Yes | Yes | 8 |
| Vancampfort 2016         | Yes | Yes | Yes | Yes     | Yes | Yes | Yes | Yes | 8 |
| Lee 2015                 | Yes | Yes | Yes | Yes     | Yes | Yes | Yes | Yes | 8 |
| Freene 2021              | Yes | Yes | Yes | N/A     | Yes | Yes | Yes | Yes | 7 |
| Tremblay-Labrecque 2020  | Yes | Yes | Yes | Yes     | Yes | No  | Yes | Yes | 7 |
| Munari 2021              | Yes | Yes | Yes | Yes     | Yes | No  | Yes | Yes | 7 |
| Marinho 2021             | Yes | Yes | Yes | Yes     | Yes | No  | Yes | Yes | 7 |
| Tsuji 2022               | Yes | Yes | Yes | Yes     | Yes | No  | Yes | Yes | 7 |
| DalCorso 2012            | Yes | Yes | Yes | Yes     | Yes | No  | Yes | Yes | 7 |
| DiThommazo-Luporini 2015 | Yes | Yes | Yes | N/A     | Yes | Yes | Yes | Yes | 7 |
| Lee 2018                 | Yes | Yes | Yes | Yes     | Yes | No  | Yes | Yes | 7 |
| Beckerman 2019           | Yes | Yes | Yes | Unclear | Yes | Yes | Yes | Yes | 7 |
| Beekman 2013             | Yes | Yes | No  | Yes     | Yes | Yes | Yes | Yes | 7 |
| Buch 2007                | Yes | Yes | Yes | Yes     | Yes | No  | Yes | Yes | 7 |
| Fowler 2011              | Yes | Yes | Yes | Yes     | Yes | No  | Yes | Yes | 7 |
| Gayda 2003               | Yes | Yes | Yes | Yes     | Yes | No  | Yes | Yes | 7 |
| Gomberg-Maitland 2007    | Yes | Yes | Yes | Yes     | Yes | No  | Yes | Yes | 7 |
| OzcanKahraman 2020       | Yes | Yes | Yes | Yes     | Yes | No  | Yes | Yes | 7 |
| Peloquin 1998            | Yes | Yes | Yes | Yes     | Yes | No  | Yes | Yes | 7 |
| PereiradeSousa 2008      | Yes | Yes | Yes | Yes     | Yes | No  | Yes | Yes | 7 |
| Radtke 2017              | Yes | Yes | Yes | Yes     | Yes | No  | Yes | Yes | 7 |
| Hansen 2016              | Yes | Yes | Yes | No      | Yes | Yes | Yes | Yes | 7 |
| Hornby 2019              | Yes | Yes | Yes | Yes     | Yes | No  | Yes | Yes | 7 |
| Kehmeier 2016            | Yes | Yes | Yes | Yes     | Yes | No  | Yes | Yes | 7 |
| Keren 1980               | Yes | Yes | Yes | N/A     | Yes | Yes | Yes | Yes | 7 |
| Leung 2006               | Yes | Yes | Yes | No      | Yes | Yes | Yes | Yes | 7 |
| Metz 2018                | Yes | Yes | Yes | Yes     | Yes | No  | Yes | Yes | 7 |
| Muller 2015              | Yes | No  | Yes | Yes     | Yes | Yes | Yes | Yes | 7 |
| Nielsen 1997             | Yes | Yes | Yes | Yes     | No  | Yes | Yes | Yes | 7 |
| Sartor 2016              | Yes | Yes | Yes | N/A     | Yes | Yes | Yes | Yes | 7 |
| Schmidt 2013             | Yes | Yes | Yes | Yes     | Yes | No  | Yes | Yes | 7 |

|                      |     |     |         |     |     |     |     |     |   |
|----------------------|-----|-----|---------|-----|-----|-----|-----|-----|---|
| Scivoletto 2011      | Yes | Yes | Yes     | Yes | Yes | No  | Yes | Yes | 7 |
| Simonsick 2006       | Yes | Yes | Yes     | No  | Yes | Yes | Yes | Yes | 7 |
| Tarrant 2020         | Yes | Yes | Yes     | Yes | Yes | No  | Yes | Yes | 7 |
| Vancampfort 2015     | Yes | No  | Yes     | Yes | Yes | Yes | Yes | Yes | 7 |
| Kakitsuka 2020       | Yes | Yes | Yes     | N/A | Yes | No  | Yes | Yes | 6 |
| Ang 2022             | Yes | Yes | Yes     | N/A | Yes | No  | Yes | Yes | 6 |
| Vancampfort 2021     | Yes | No  | No      | Yes | Yes | Yes | Yes | Yes | 6 |
| Diaz-Balboa 2022     | No  | Yes | Yes     | Yes | Yes | No  | Yes | Yes | 6 |
| Gephine 2020         | Yes | Yes | Yes     | Yes | No  | No  | Yes | Yes | 6 |
| daCunha-Filho 2007   | Yes | Yes | Yes     | Yes | No  | No  | Yes | Yes | 6 |
| DalCorso 2007        | Yes | Yes | Yes     | No  | Yes | No  | Yes | Yes | 6 |
| Kervio 2003          | Yes | Yes | Yes     | N/A | Yes | No  | Yes | Yes | 6 |
| Kervio 2004          | Yes | Yes | Yes     | Yes | No  | No  | Yes | Yes | 6 |
| Knight 2014          | Yes | Yes | Yes     | N/A | Yes | No  | Yes | Yes | 6 |
| Lemanska 2019        | Yes | Yes | Yes     | Yes | No  | No  | Yes | Yes | 6 |
| Asakuma 1999         | Yes | Yes | Yes     | Yes | No  | No  | Yes | Yes | 6 |
| Carbonell-Baeza 2015 | Yes | Yes | Yes     | Yes | No  | No  | Yes | Yes | 6 |
| Carvalho 2011        | Yes | Yes | Yes     | Yes | No  | No  | Yes | Yes | 6 |
| Giacomantonio 2020   | Yes | Yes | Yes     | Yes | No  | No  | Yes | Yes | 6 |
| Olper 2011           | Yes | Yes | No      | Yes | Yes | Yes | No  | Yes | 6 |
| Pankoff 2000         | Yes | Yes | Yes     | No  | Yes | No  | Yes | Yes | 6 |
| PV@loquin 1998       | Yes | Yes | Yes     | Yes | No  | No  | Yes | Yes | 6 |
| Radtke 2016          | Yes | No  | Yes     | Yes | Yes | No  | Yes | Yes | 6 |
| Reilly 2010          | Yes | No  | Yes     | N/A | Yes | Yes | Yes | Yes | 6 |
| Guo 2018             | Yes | Yes | Yes     | N/A | Yes | No  | Yes | Yes | 6 |
| Hwang 2016           | Yes | No  | Yes     | Yes | Yes | No  | Yes | Yes | 6 |
| Irisawa 2014         | Yes | Yes | Yes     | Yes | No  | No  | Yes | Yes | 6 |
| Jehn 2009            | Yes | Yes | No      | Yes | Yes | No  | Yes | Yes | 6 |
| Jette 1992           | Yes | Yes | Unclear | Yes | Yes | No  | Yes | Yes | 6 |
| Lin 2008             | Yes | Yes | No      | Yes | Yes | No  | Yes | Yes | 6 |
| Magalhaes 2020       | Yes | Yes | Yes     | Yes | No  | No  | Yes | Yes | 6 |
| Mazzoni 2018         | Yes | Yes | Yes     | Yes | No  | No  | Yes | Yes | 6 |
| Mercer 1998          | Yes | Yes | Yes     | Yes | No  | No  | Yes | Yes | 6 |
| Modai 2015           | Yes | Yes | Yes     | No  | Yes | No  | Yes | Yes | 6 |
| Reychler 2018        | No  | Yes | Yes     | Yes | Yes | No  | Yes | Yes | 6 |
| Rodrigues 2016       | Yes | Yes | Unclear | Yes | Yes | No  | Yes | Yes | 6 |
| Simmonds 2002        | Yes | Yes | Yes     | Yes | No  | No  | Yes | Yes | 6 |
| Spagnuolo 2010       | Yes | Yes | No      | Yes | Yes | No  | Yes | Yes | 6 |

|                      |         |     |         |         |     |         |         |     |   |
|----------------------|---------|-----|---------|---------|-----|---------|---------|-----|---|
| Sykes 2004           | Yes     | No  | Yes     | N/A     | Yes | Yes     | Yes     | Yes | 6 |
| Vancampfort 2020     | Yes     | No  | Yes     | No      | Yes | Yes     | Yes     | Yes | 6 |
| Vancampfort 2011     | Yes     | Yes | Yes     | No      | Yes | No      | Yes     | Yes | 6 |
| Webb 2014            | No      | Yes | Yes     | Yes     | Yes | No      | Yes     | Yes | 6 |
| Zanini 2015          | Yes     | Yes | No      | Yes     | Yes | No      | Yes     | Yes | 6 |
| Lazaro-Martinez 2022 | No      | Yes | Yes     | Yes     | No  | No      | Yes     | Yes | 5 |
| Quintino 2021        | Yes     | No  | Yes     | No      | Yes | No      | Yes     | Yes | 5 |
| Vilarinho 2022       | Yes     | Yes | No      | Yes     | Yes | No      | No      | Yes | 5 |
| Chow 2022            | Yes     | Yes | No      | Yes     | No  | No      | Yes     | Yes | 5 |
| Cox 1992             | No      | Yes | Yes     | No      | Yes | No      | Yes     | Yes | 5 |
| Curb 2006            | Yes     | No  | No      | No      | Yes | Yes     | Yes     | Yes | 5 |
| Eiser 2003           | Yes     | Yes | No      | No      | Yes | No      | Yes     | Yes | 5 |
| Kierkegaard 2007     | Yes     | Yes | No      | Yes     | No  | No      | Yes     | Yes | 5 |
| Kieu 2020            | Yes     | Yes | Yes     | No      | No  | No      | Yes     | Yes | 5 |
| Kon 2013             | Yes     | No  | No      | Yes     | Yes | No      | Yes     | Yes | 5 |
| Bardin 2012          | Yes     | Yes | No      | No      | Yes | Unclear | Yes     | Yes | 5 |
| BenSaad 2009         | Yes     | Yes | No      | Yes     | No  | No      | Yes     | Yes | 5 |
| Beretta 2007         | Yes     | Yes | No      | Yes     | Yes | No      | No      | Yes | 5 |
| Boer 2016            | Yes     | Yes | Unclear | No      | Yes | No      | Yes     | Yes | 5 |
| Bronner 2014         | Yes     | Yes | N/A     | No      | Yes | No      | Yes     | Yes | 5 |
| Hong 2019            | No      | Yes | Yes     | N/A     | Yes | No      | Yes     | Yes | 5 |
| Jones 2018           | Yes     | Yes | No      | Yes     | No  | No      | Yes     | Yes | 5 |
| Keisuke 2015         | Yes     | Yes | Yes     | N/A     | No  | No      | Yes     | Yes | 5 |
| Mänttari 2018        | Yes     | No  | Yes     | N/A     | No  | Yes     | Yes     | Yes | 5 |
| Marcora 2007         | Yes     | Yes | Yes     | Unclear | No  | No      | Yes     | Yes | 5 |
| Mossberg 2003        | Yes     | Yes | No      | No      | Yes | No      | Yes     | Yes | 5 |
| Nathan 2015          | No      | Yes | No      | Yes     | Yes | Yes     | No      | Yes | 5 |
| Rolland 2004         | Yes     | No  | Yes     | N/A     | Yes | Yes     | No      | Yes | 5 |
| Santo 2003           | Yes     | No  | Yes     | N/A     | Yes | No      | Yes     | Yes | 5 |
| Vagaggini 2003       | Yes     | Yes | Yes     | No      | No  | No      | Yes     | Yes | 5 |
| deJesus 2022         | Unclear | Yes | Yes     | No      | No  | No      | Yes     | Yes | 4 |
| Correa 2013          | Yes     | No  | No      | Yes     | No  | No      | Yes     | Yes | 4 |
| Kohlbrenner 2020     | Yes     | Yes | No      | Unclear | No  | No      | Yes     | Yes | 4 |
| Bauman 1997          | Yes     | Yes | No      | No      | No  | Unclear | Yes     | Yes | 4 |
| Berghmans 2013       | Yes     | No  | Yes     | No      | Yes | No      | Unclear | Yes | 4 |
| Beutner 2015         | No      | No  | Yes     | No      | Yes | No      | Yes     | Yes | 4 |
| Borel 2010           | No      | No  | Yes     | No      | Yes | No      | Yes     | Yes | 4 |
| Cabeza-Ruiz 2019     | Yes     | No  | Yes     | No      | No  | No      | Yes     | Yes | 4 |
| Carter 2002          | Yes     | No  | Yes     | Yes     | No  | No      | No      | Yes | 4 |

|                      |     |     |     |         |         |         |         |     |   |
|----------------------|-----|-----|-----|---------|---------|---------|---------|-----|---|
| Francis 1988         | No  | Yes | Yes | N/A     | No      | No      | Yes     | Yes | 4 |
| Hanson 2012          | No  | No  | Yes | Unclear | Yes     | Yes     | No      | Yes | 4 |
| Levesque 2019        | Yes | Yes | No  | Yes     | No      | No      | No      | Yes | 4 |
| Ljungquist 2003      | Yes | No  | No  | No      | Yes     | No      | Yes     | Yes | 4 |
| Siconolfi 1985       | Yes | No  | Yes | N/A     | No      | No      | Yes     | Yes | 4 |
| Thornton 2017        | No  | No  | Yes | N/A     | Yes     | No      | Yes     | Yes | 4 |
| Wanwisa 2015         | No  | No  | Yes | Unclear | Yes     | No      | Yes     | Yes | 4 |
| Witham 2012          | No  | No  | Yes | No      | Yes     | No      | Yes     | Yes | 4 |
| deMelo 2022          | No  | Yes | No  | N/A     | No      | No      | Yes     | Yes | 3 |
| Aadahl 2013          | Yes | No  | No  | No      | Unclear | No      | Yes     | Yes | 3 |
| Chatterjee 2005      | No  | No  | Yes | N/A     | No      | No      | Yes     | Yes | 3 |
| Kristjánsdóttir 2004 | No  | No  | Yes | No      | No      | No      | Yes     | Yes | 3 |
| Grant 1999           | No  | No  | Yes | N/A     | No      | No      | Yes     | Yes | 3 |
| Montgomery 1992      | No  | No  | No  | No      | Yes     | No      | Yes     | Yes | 3 |
| Selig 2000           | No  | No  | Yes | No      | No      | No      | Yes     | Yes | 3 |
| Donaldson 2019       | No  | No  | No  | No      | No      | No      | Yes     | Yes | 2 |
| Benton 2009          | No  | No  | No  | No      | Unclear | Unclear | Yes     | Yes | 2 |
| VanGraan 1970        | No  | No  | Yes | N/A     | No      | No      | Unclear | No  | 1 |

196 **Table 1:** Quality assessment JBI critical appraisal checklist.

## 197 **3.4 Participant characteristics**

198 In total 15,670 participants were included across the 143 studies. The smallest study included  
 199 5 participants (39), the largest 5287 (115). Six studies reported no sex distribution, of the  
 200 studies reporting, 5588 participants were female (approximately 37%).

201

### 202 **3.4.1 Special populations**

203 Thirty-nine studies included no specific medical condition inclusion criteria. Participants  
 204 selected for respiratory conditions (including COPD, restrictive lung disease and sleep  
 205 apnoea) were studied in 29 papers. Cardiovascular conditions were the focus in 21.

206 Musculoskeletal, neurological, auto-immune, psychological and age based sub-groups were  
207 also studied in the remaining papers.

208

209 **3.5 Measures** – All included studies reported clinical test performance correlation  
210 with GXT performance in terms of Pearson’s r. Test-retest reliability was reported in terms of  
211 ICC or Pearson’s r.

212

## 213 **3.6 Clinical tests**

### 214 **3.6.1 Walk test protocols**

#### 215 **3.6.1.1 6MWT**

216 A total of 71 included papers studied the 6MWT, with 21 cohorts from a total of 19  
217 studies meeting inclusion in the meta-analysis for validity with correlation between 6MWT  
218 and directly measure VO<sub>2</sub> peak on GXT results included. In total these studies included 1836  
219 participants with a broad range of medical conditions. Overall the 6MWT demonstrated  
220 moderate positive correlation with performance on the graded exercise test (GXT), with  
221  $r=0.581$  (figure 2). The largest study, Shulman et al studied 574 adults older than 40 years  
222 awaiting elective non-cardiac surgery, and all participants had at least one cardiac risk factor,  
223 with low positive correlation overall  $r=0.36$  (28). Kervio et al’s study of 24 patients of mean  
224 age 65 with NYHA grade II or III congestive cardiac failure (CCF) found the strongest  
225 association with GXT performance  $r=0.8$  (16). Granger et al’s study of a cohort of 20 male lung  
226 cancer patients found the lowest correlation,  $r = 0.24$  (58). Pankoff et al’s study of a

227 fibromyalgia cohort pre and post exercise program found the pre-exercise cohort correlation  
228 of  $r=0.33$  (30). The only included study of a ‘healthy’ population, Hong et al, involved a cohort  
229 of 73 healthy adults (37male, 36 female), mean age 30.8 who were screened for  
230 cardiorespiratory, orthopaedic and musculoskeletal conditions prior to participation, and  
231 found a correlation between 6MWT and GXT performance of  $r=0.671$ . Overall four studies of  
232 five CCF populations were included, with correlations ranging from 0.54 to 0.8 (16, 17, 23,  
233 25). Two studies analysed pulmonary artery hypertension populations, with strong  
234 correlation noted  $r=0.77$  and  $r=0.72$  (18, 19).

235 **Fig 2:** 6MWT performance vs GXT correlation forest plot

236 Test-retest reliability of the 6MWT was studied in 27 studies of 1506 participants. In meta-  
237 analysis of 22 studies of 965 patients, with reliability measured by ICC, an overall ICC of 0.95,  
238 indicating strong test-retest reliability. For the remaining five studies of 541 participants  
239  $r=0.93$ .

240 **Fig 3:** 6MWT reliability (pearson’s r) forest plot

241 **Fig 4:** 6MWT reliability (ICC) forest plot

242

243

#### 244 **3.6.1.2 ISWT**

245 Fourteen studies included the ISWT, with 5 studies meeting inclusion in the meta-  
246 analysis for validity (18, 58, 88, 92, 93, 94). In total these studies included 114 participants.  
247 Overall the ISWT demonstrated strong positive correlation with performance on GXT, with



248  $r=0.768$ . De Camargo et al's study of a cohort of 75 patients with bronchiectasis was the  
249 largest cohort, with  $r=0.72$  compared with a cycle ergometer GXT (88). Barbosa et al's study  
250 of 50 asthma patients demonstrated the strong validity of the ISWT in this cohort at  $r=0.9$   
251 (93). Irisawa et al's study of 19 patients with pulmonary artery hypertension (PAH) also  
252 demonstrated the strong validity,  $r=0.866$ , with participants recording the lowest mean ISWT  
253 distance (ISWD) at 359.4m, compared with 441m and 410m for the de Camargo and Granger  
254 cohorts respectively (18, 58, 88). Granger et al studied an all-male population of 20 non-small  
255 cell lung cancer patients with  $r=0.61$  (58).

256 **Fig 5:** ISWT performance vs GXT correlation forest plot

257 Test-retest reliability was very high across the five studies meeting inclusion criteria for  
258 reliability, with  $ICC=0.94$  from 284 participants (37, 63, 88, 93, 94).

259 **Fig 6:** ISWT reliability (ICC) forest plot

260

### 261 **3.6.1.3 2-minute walk test (2MWT)**

262 In total four papers included the 2MWT, however an insufficient number met the  
263 inclusion criteria to be meta-analysed. Two studies assessed the 2MWT performance  
264 correlation with GXT. Beckerman et al studied 141 patients with multiple sclerosis, finding  
265 poor validity  $r=0.44$  (116). Leung et al studied 45 patients with moderate to severe COPD,  
266 finding a moderate correlation  $r=0.56$  (66).

267 Two studies found strong test-retest reliability for the 2MWT, with again insufficient  
268 numbers included to be meta-analysed. Vancampfort (66) and Leung respectively found  
269  $ICC=0.96$  and  $ICC=0.99$  (66, 83).

270

## 271 **3.6.2 Step tests**

### 272 **3.6.2.1 Siconolfi step test (SST)**

273 Three studies met the inclusion criteria for validity meta-analysis, with an overall  
274 population of 138 patients included and a strong correlation of  $r=0.81$  established. Lemanska  
275 et al's study of 66 men with prostate cancer was the largest included, with the weakest  
276 correlation at  $r=0.69$  (112). Siconolfi's original study of 48 healthy adults found a correlation  
277 of  $r=0.92$  with a cycle ergometer GXT (114). Cooney et al found a strong correlation of  $r = 0.79$   
278 in 24 patients with rheumatoid arthritis (RA)(111).

#### 279 **Fig 7: SST vs GXT correlation forest plot**

280 Reliability was very strong for the SST across 120 patients from 3 studies, with ICC =  
281 0.92 demonstrating good test-retest reliability (111, 112, 113).

#### 282 **Fig 8: SST reliability (ICC) forest plot**

### 283 **3.6.2.2 Chester step test (CST)**

284 Two included studies assessed the validity of the Chester step test (117, 118). Sykes  
285 et al assessed 68 healthy adults and found strong correlation between CST and GXT result,  
286  $r=0.92$ , with a standard error of predicted estimate of aerobic capacity ( $VO_{2peak}$ )  
287  $3.9mlO_2/kg/min$  (118). Reed et al in their 2020 study of 47 cardiac rehabilitation participants  
288 also found high moderate correlation  $r=0.693$  (117). Their CST involved adjustment of step  
289 height within a range between 15-30cm "suitable to participants functional level". Of note

290 the Sykes population achieved a mean VO<sub>2</sub>Max of 52.1mlO<sub>2</sub>/kg/min, suggesting a good level  
291 of CRF, and validity in a population with good levels of fitness.

292 Neither study included correlation reliability statistics. Sykes et al (119) reported good  
293 test-retest reliability using the Bland and Altman method, finding a mean difference of -  
294 0.7mlO<sub>2</sub>/kg/min (119).

295

### 296 **3.6.2.3 6 minute step test (6MST)**

297 Two studies correlated GXT performance with 6MST performance to determine  
298 validity, Giacomantonio et al found a strong correlation with GXT of  $r=0.88$  in a population of  
299 28 participants with two or more CVD risk factors, whereas Marinho et al found a weaker  
300  $r=0.59$  in 27 heart failure with reduced ejection fraction (HFrEF) patients (64, 109). Five  
301 studies of a total of 194 participants found good reliability, ICC = 0.97 across varied  
302 populations of healthy adults, an obstructive sleep apnoea cohort, patients with COPD and  
303 the above CVD and HFrEF cohort (Figure 9) (64, 72, 105, 108, 109).

304 **Figure 9: 6MST reliability (ICC) forest plot**

### 305 **3.6.2.4 2 minute step test (2MST)**

306 One study assessed validity of the 2MST, finding a moderate correlation ( $r=0.54$ ) with  
307 GXT performance, in a population of 36 Australian adults (120). The 2MST has demonstrated  
308 strong reliability (ICC>0.9) in two studies of 68 participants (121, 122)

### 309 **3.6.2.4 YMCA step test (YMCAST)**

310 Kieu et al demonstrated the validity of a YMCAST equation developed and validated  
311 for a Korean population aged 19-64 years, in a population of Vietnamese participants, with a  
312 correlation of 0.8 with treadmill VO<sub>2</sub>max (123). Santo et al (124) also earlier demonstrated  
313 the validity of the YMCAST in a cohort of healthy participants via recovery heart rate  
314 correlation with treadmill GXT VO<sub>2</sub>max (124), demonstrating a correlation of 0.58 using an  
315 adjustable step height based on participant's height which may limit clinical applicability,  
316 however remains a potentially valid predictor of CRF.

317 No included studies assessed the reliability of the YMCAST.

### 318 **3.6.2.5 Canadian aerobic fitness test (CAFT)**

319 The CAFT was assessed in two studies describing three healthy cohorts of 60 participants  
320 in total (125, 126). Moderate correlation between CAFT performance and GXT performance  
321 was determined,  $r=0.645$ .

322 No test re-test reliability was established in included studies.

323

324

### 325 **3.6.3 Squat tests**

#### 326 **3.6.3.1 1 minute sit to stand test (1MSTST)**

327 In total ten studies involving the 1MSTST were included, with three studies meeting the  
328 inclusion criteria for validity meta-analysis. Four studies of a total of 70 participants found an  
329 overall correlation of  $r=0.649$  (98, 99, 101, 103). Radtke 2016, and Radtke 2017 studied a  
330 population with cystic fibrosis in pulmonary rehabilitation, with moderate and weak to

331 moderate correlation between the STS repetitions completed and VO<sub>2</sub>peak on GXT (98, 99).  
332 Gephine et al studied of a population with COPD demonstrated moderate to strong  
333 correlation between STS repetitions and VO<sub>2</sub>peak on GXT at 0.71 (101).

334 **Fig 10: 1MSTST correlation with GXT forest plot**

335 Five studies including 185 participants reported the reliability of the 1MSTST as strong,  
336 with an ICC on meta-analysis of 0.949 (80, 99, 100, 103, 127).

337 **Fig 11: 1MSTST reliability forest plot**

338

### 339 **3.6.3.2 30 second sit to stand test (30STST)**

340 No study of the validity of the 30STST meeting our inclusion criteria was included.

341 Three studies, Hansen et al (2018) in a cohort of patients with COPD and Ozcan-Kahraman  
342 et al (2020) a cohort of patients with pulmonary hypertension, and Lázaro-Martínez et al  
343 (2022) a cohort of patients with obesity, of a total of 147 participants demonstrated strong  
344 reliability, with an ICC of 0.94 and 0.95, and r=0.91 respectively (84, 87, 128).

### 345 **3.6.3.3 The 5 repetition sit to stand test (5STST)**

346 No study of the validity of the 5STST meeting our inclusion criteria was included.

347 Meta-analysis revealed ICC=0.91 demonstrating strong reliability. The 3 included studies  
348 demonstrated strong reliability individually. Curb et al (2006) studied 210 healthy  
349 participants, and found an ICC=0.8 (71). Jones et al (2013) studied 475 participants with COPD  
350 and found very strong reliability, an ICC of 0.97 (96). De Melo et al (2022) assessed reliability  
351 in 142 ICU patients at discharge (129).

352 **Fig 12:** 5STST reliability (ICC)

353

#### 354 **3.6.3.4 Ruffier-Dickson squat test (RDST)**

355 One study of 40 healthy adults, performed by Guo et al found a correlation of 0.82  
356 between a model incorporating test performance as quantified using participants' height, sex,  
357 age and resting, immediate post-test and one minute post-test HR, and GXT VO<sub>2</sub>max (130).

358 Sartor et al (2016) found the RDST demonstrated good reliability in a population of 81  
359 healthy adults (12). Reliability was calculated measuring both HR<sub>peak</sub> (ICC = 0.86) and via the  
360 Ruffier-Dickson Index (RDI), incorporating resting, post-test and one minute post-test HR.

361

#### 362 **3.6.4 Others**

##### 363 **3.6.4.1 Timed up and go test (TUGT)**

364 No included study of the validity of the TUGT met our inclusion criteria.

365 Four studies including a total of 417 participants demonstrated strong reliability, with a  
366 meta-analysis ICC of 0.94 (35, 86, 87, 90). This population included health adults (Spagnuolo  
367 et al), a cohort of patients with pulmonary hypertension (Ozcan-Kahraman et al), a cohort of  
368 patients with Down syndrome (Cabeza-Ruiz et al) and a CCF cohort (Hwang et al)(35, 86, 87,  
369 90).

##### 370 **3.6.4.2 1RM leg press**

371 Three studies analysing the 1RM leg press met the inclusion criteria, however none  
372 included reliability or validity statistics relevant to this review (75, 81, 131).

373

374

## 375 **4. Discussion**

376 The purpose of this review was to provide clinicians with information regarding the validity  
377 and reliability of submaximal tests of CRF that can be employed in a brief primary health care  
378 consultation with equipment that is readily available. This review included 143 studies of 49  
379 clinical tests. Diverse populations of 15,670 total participants were included from studies  
380 meeting the inclusion criteria, as guided by the aims of the broad review, with a view to  
381 maintaining clinical relevance and applicability. Overall reliability of all tests included in meta-  
382 analyses were strong. Strongest validity was found for the SST, ISWT and 1MSTST on meta  
383 analysis.

384

### 385 **4.1 Reliability**

386 This review provides strong evidence for the reliability of the included clinical tests. The test-  
387 retest reliability of all included tests was high on meta-analysis. Meta-analysis revealed the  
388 6MST was the most reliable test, however overall, all studies meta-analysed had a reliability  
389 of >0.9, and there was little difference between them. Of the studies included but in  
390 insufficient number to meta-analyse, good reliability was demonstrated for the 30STST, 5STST  
391 and RDST (12, 71, 84, 87, 96, 128, 129). The high test-retest reliability of the majority of the

392 tests suggests they can be used to monitor changes in CRF over time as the results are  
393 evidently repeatable.

394

## 395 **4.2 Validity**

396 This study has demonstrated moderate to strong evidence regarding the efficacy of a variety  
397 of clinical tests to estimate CRF in adults. Amongst those included in meta-analysis, the  
398 Siconolfi step test demonstrated strongest validity from three studies of 138 participants of  
399 varied populations, including those with oncological and rheumatological conditions, as well  
400 as a healthy population (111, 112, 114).

401

402 Overall the walking tests, whilst the most studied, demonstrated poorer validity than the step  
403 or squat based tests. A high proportion of the included studies assess populations with  
404 generally poorer CRF as the test was intended, however the overall meta-analysis result  
405 supports the well documented ceiling effect of the 6MWT, and limiting the clinical  
406 applicability to the broader population (132, 133). This result supports that it may have more  
407 clinical utility in the rehabilitation setting, involving participants with lower VO<sub>2</sub> peak. The  
408 ISWT demonstrated good validity and reliability on meta-analysis across five studies, and  
409 given this should be considered by clinicians (18, 134).

410

411 Step tests demonstrated good validity across studies of diverse populations, and have good  
412 clinical translation potential having to date been investigated to a lesser extent than walk  
413 tests. Of individual included studies, Sykes' Chester step test paper demonstrates the



414 strongest correlation with CRF(118). This may suggest that tests relying on HR measures  
415 conducted during test are superior to post/HR recovery based tests, and warrants further  
416 investigation. The three studies investigating the Siconolfi step test demonstrated highest  
417 correlation on meta-analysis, but with only 133 participants total, further investigation is  
418 warranted to further demonstrate the test's value to the clinician(111, 112, 114). The 2MST  
419 demonstrated only moderate correlation with GXT CRF in the single included study, which  
420 may suggest there is insufficient duration to differentiate CRF levels in a well population (120).

421

422 Of the included squat tests, only one, 1MSTST, included sufficient data for meta-analysis.  
423 Seventy participants completing the 1MSTS with a moderate to strong correlation with CRF.  
424 The single papers were contrasting in their correlation with GXT, such as that of Guo et al  
425 (130)(RDST) demonstrated the RDST has good validity (0.82) using the author's predictive  
426 model, however Diaz-Balboa's (135) paper (30STST) demonstrated poor to moderate  
427 correlation – perhaps highlighting squat tests' perceived limitations of relying more heavily  
428 on patients functional status, and reliance on HR recovery (130, 135).

429

### 430 **4.3 Risk of bias**

431 Overall quality of included studies was good, with high quality reporting to allow scientific  
432 replication. The vast majority of papers meta-analysed were moderate to low risk of bias,  
433 providing confidence that the results were unbiased. Many studies didn't report or control  
434 for confounding factors, which may have influenced outcomes in some cases. In order for

435 further adaptation of clinical tests of CRF in clinical practice, larger high-quality studies  
436 controlling confounding factors must be undertaken.

437

438

#### 439 **4.4 Strengths and limitations**

440 The aim of this meta-analysis was to aggregate a wide array of populations and submaximal  
441 tests of CRF to maximise clinical application. Omission of studies of tests longer than 10  
442 minutes, and requiring minimal but not the absence of equipment increases the risk of bias,  
443 and may have excluded highly relevant studies. This however allowed the goal of maintaining  
444 a clinical applicability lens to be met. The comparison between studies may have been limited  
445 by the heterogeneity of GXT protocols, as has been discussed by authors previously, however  
446 with a view to pragmatism, GXT performance was taken at face value from the included  
447 studies (136, 137). The selection criteria applied included only adult data in the analysis, and  
448 where papers included paediatric participants, adult data were extracted where possible and  
449 the study included, however in some cases the adult data could not be extracted in isolation  
450 and so that data set excluded, potentially impacting overall study results. The review included  
451 only English language papers, potentially excluding relevant studies. By design, this study  
452 included a broad population and large number of clinical tests which can be utilised in a  
453 standard primary care consultation. Further research is warranted into the applicability of  
454 valid and reliable clinical tests in specific populations.

455

456

457

## 458 **5. Conclusion**

459 The safe, cost-effective and accurate assessment and regular monitoring of CRF in the primary  
460 health care setting presents the clinician with the opportunity to personalise exercise  
461 prescription and counselling for their patient, whilst providing the patient with motivation  
462 and accountability to improve their health outcomes. This review has identified a number of  
463 submaximal tests of CRF which can be employed in a standard medical consultation. The SST  
464 and CST demonstrate their potential for clinical translation with further investigation in larger  
465 populations. The ISWT appears superior to the 6MWT and should be considered by clinicians.  
466 Based on the validity of the tests outlined, these can be used as an acceptable method of  
467 estimating VO<sub>2</sub>peak in a broad population, without the cost and access issues of formal GXT.  
468 The high test-retest reliability of the majority of the tests suggests they can be used to  
469 monitor changes in CRF over time. Further research is needed to optimise the translation of  
470 research-based exercise testing into regular clinical practice.

471

472

473

474

475

476

477

## 478 Reference:

- 479 1. Brown WJ, Bauman A.E., Bull, F.C., Burton N.W. Development of Evidence-based  
480 Physical Activity Recommendations for Adults (18-64 years). . Report prepared for the  
481 Australian Government Department of Health, August 2012. 2012.
- 482 2. Australian Institute of Health and Welfare. Australia's health 2018. Canberra: AIHW.  
483 2018.
- 484 3. Australian Institute of Health and Welfare. Australian Burden of Disease Study:  
485 impact and causes of illness and death in Australia 2015. Canberra: AIHW. 2019.
- 486 4. Crosland P, Ananthapavan, J., Davison, J., Lambert, M., Carter, R. The economic cost  
487 of preventable disease in Australia: a systematic review of estimates and methods.  
488 Australian and New Zealand Journal of Public Health. 2019;43(5):484-95.
- 489 5. Kodama S, Saito K, Tanaka S, Maki M, Yachi Y, Asumi M, et al. Cardiorespiratory  
490 Fitness as a Quantitative Predictor of All-Cause Mortality and Cardiovascular Events in  
491 Healthy Men and Women: A Meta-analysis. JAMA. 2009;301(19):2024-35.
- 492 6. Ross R, Blair SN, Arena R, Church TS, Després JP, Franklin BA, et al. Importance of  
493 Assessing Cardiorespiratory Fitness in Clinical Practice: A Case for Fitness as a Clinical Vital  
494 Sign: A Scientific Statement From the American Heart Association. Circulation.  
495 2016;134(24):e653-e99.
- 496 7. Ainsworth BE, Haskell WL, Herrmann SD, Meckes N, Bassett Jr DR, Tudor-Locke C, et  
497 al. 2011 Compendium of Physical Activities: a second update of codes and MET values. Med  
498 Sci Sports Exerc. 2011;43(8):1575-81.
- 499 8. Myers J, Prakash M, Froelicher V, Do D, Partington S, Atwood JE. Exercise Capacity  
500 and Mortality among Men Referred for Exercise Testing. New England Journal of Medicine.  
501 2002;346(11):793-801.
- 502 9. Cadore E, Rodríguez-Mañas L, Sinclair A, Izquierdo M. Effects of different exercise  
503 interventions on risk of falls, gait ability, and balance in physically frail older adults: a  
504 systematic review. Rejuvenation Res. 2013;16(2):105-14.
- 505 10. Kaminsky LA, Arena R, Beckie TM, Brubaker PH, Church TS, Forman DE, et al. The  
506 Importance of Cardiorespiratory Fitness in the United States: The Need for a National  
507 Registry. Circulation. 2013;127(5):652-62.
- 508 11. Poole DC, Wilkerson DP, Jones AM. Validity of criteria for establishing maximal O<sub>2</sub>  
509 uptake during ramp exercise tests. Eur J Appl Physiol. 2008;102(4):403-10.
- 510 12. Sartor F, Bonato M, Papini G, Bosio A, Mohammed RA, Bonomi AG, et al. A 45-  
511 second self-test for cardiorespiratory fitness: Heart rate-based estimation in healthy  
512 individuals. PLoS ONE. 2016;11(12).
- 513 13. Aromataris E, (Editors) MZ. JBI Manual for Evidence Synthesis. JBI. 2020.
- 514 14. Kristjánssdóttir AR, M.;Einarsson, M. B.;Torfason, B. A comparison of the 6-minute  
515 walk test and symptom limited graded exercise test for Phase II cardiac rehabilitation of  
516 older adults. J Geriatr Phys Ther. 2004;27(2):65-8.
- 517 15. Mänttari AS, Jaana;Sievänen, Harri;Husu, Pauliina;Vähä-Ypyä, Henri;Valkeinen,  
518 Heli;Tokola, Kari;Vasankari, Tommi. Six-minute walk test: a tool for predicting maximal  
519 aerobic power (VO<sub>2</sub> max) in healthy adults. Clin Physiol Funct Imaging. 2018;38(6):1038-45.
- 520 16. Kervio GV, N. S.;Leclercq, C.;Daubert, J. C.;Carre, F. Intensity and daily reliability of  
521 the six-minute walk test in moderate chronic heart failure patients. Archives of Physical  
522 Medicine and Rehabilitation. 2004;85(9):1513-8.

- 523 17. Guazzi MD, K.;Vicenzi, M.;Arena, R. Six-minute walk test and cardiopulmonary  
524 exercise testing in patients with chronic heart failure: a comparative analysis on clinical and  
525 prognostic insights. *Circ.* 2009;2(6):549-55.
- 526 18. Irisawa HT, K.;Inui, N.;Miyakawa, S.;Morishima, Y.;Mizushima, T.;Watanabe, H.  
527 Incremental shuttle walk test as a valuable assessment of exercise performance in patients  
528 with pulmonary arterial hypertension. *Circulation Journal.* 2014;78(1):215-21.
- 529 19. Fowler RMJ, S. C.;Maiorana, A. J.;Gain, K. R.;O'Driscoll, G.;Gabbay, E. Measurement  
530 properties of the 6-min walk test in individuals with exercise-induced pulmonary arterial  
531 hypertension. *Internal Medicine Journal.* 2011;41(9):679-87.
- 532 20. Kehmeier ESS, M. H.;Galonska, A.;Zeus, T.;Verde, P.;Kelm, M. Diagnostic value of the  
533 six-minute walk test (6MWT) in grown-up congenital heart disease (GUCH): Comparison  
534 with clinical status and functional exercise capacity. *International Journal of Cardiology.*  
535 2016;203:90-7.
- 536 21. Pereira de Sousa LAB, R. R.;Ribeiro, A. L.;Baracho, S. M.;da Costa Val Barros,  
537 V.;Carvalho, V. T.;Parreira, V. F. Six-minute walk test in patients with permanent cardiac  
538 pacemakers. *J Mol Signal.* 2008;28(4):253-7.
- 539 22. Carvalho EEC, D. C.;Crescencio, J. C.;Santi, G. L.;Papa, V.;Marques, F.;Schmidt,  
540 A.;Marin-Neto, J. A.;Simoies, M. V.;Gallo Junior, L. Heart failure: comparison between six-  
541 minute walk test and cardiopulmonary test. *Arquivos Brasileiros de Cardiologia.*  
542 2011;97(1):59-64.
- 543 23. Schmidt KV, L.;Thiel, C.;Jager, E.;Banzer, W. Validity of the six-minute walk test in  
544 cancer patients. *International journal of sports medicine.* 2013;34(7):631-6.
- 545 24. Mossberg KAF, E. Responsiveness and validity of the six-minute walk test in  
546 individuals with traumatic brain injury. *Physical therapy.* 2012;92(5):726-33.
- 547 25. Maldonado-Martin SB, P. H.;Kaminsky, L. A.;Moore, J. B.;Stewart, K. P.;Kitzman, D.  
548 W. The relationship of a 6-min walk to VO<sub>2</sub> peak and VT in older heart failure patients.  
549 *Med Sci Sports Exerc.* 2006;38(6):1047-53.
- 550 26. Carter RH, D. B.;Grothues, C.;Nwasuruba, C.;Stocks, J.;Tiep, B. Criterion validity of the  
551 Duke Activity Status Index for assessing functional capacity in patients with chronic  
552 obstructive pulmonary disease. *Journal of Cardiopulmonary Rehabilitation.* 2002;22(4):298-  
553 308.
- 554 27. Vancampfort DB, R.;Sienaert, P.;Wyckaert, S.;De Herdt, A.;De Hert, M.;Probst, M.  
555 Validity of the 6min walk test in outpatients with bipolar disorder. *Psychiatry research.*  
556 2015;230(2):664-7.
- 557 28. Shulman MAC, B. H.; Wijeysondera, D. N.; Pearse, R. M.; Thompson, B.; Torres, E.; et  
558 al. Using the 6-minute walk test to predict disability-free survival after major surgery. *British*  
559 *Journal of Anaesthesia.* 2019;122(1):111-9.
- 560 29. Metz LT, David;Peirrerera, Bruno;Richard, Ruddy;Julian, Valérie;Duclos, Martine. A new  
561 equation based on the 6-min walking test to predict VO<sub>2</sub>peak in women with obesity.  
562 *Disabil Rehabil.* 2018;40(14):1702-7.
- 563 30. Pankoff BO, T.;Lucy, D.;White, K. Validity and responsiveness of the 6 minute walk  
564 test for people with fibromyalgia. *Journal of Rheumatology.* 2000;27(11):2666-70.
- 565 31. Beretta LS, A.;Lemos, A.;Masciocchi, M.;Scorza, R. Validity of the Saint George's  
566 Respiratory Questionnaire in the evaluation of the health-related quality of life in patients  
567 with interstitial lung disease secondary to systemic sclerosis. *Rheumatology.*  
568 2007;46(2):296-301.

- 569 32. Donaldson SW, L.;Day, A.;Weiford, B. Validity of a Submaximal 6-min Recumbent  
570 Stepper Test for Cardiac Rehabilitation. *Journal of Cardiopulmonary Rehabilitation and*  
571 *Prevention*. 2019;39(2):E14-E7.
- 572 33. Lin SJB, N. H. Six-minute walk test in persons with transtibial amputation. *Arch Phys*  
573 *Med Rehabil*. 2008;89(12):2354-9.
- 574 34. Olper LC, P.;De Santi, F.;Meloni, C.;Gatti, R. Validation of the treadmill Six-Minute  
575 Walk Test in people following cardiac surgery. *Physical therapy*. 2011;91(4):566-76.
- 576 35. Cabeza-Ruiz RA-C, F. J.;Ruiz-Gavilan, I.;Sanchez-Lopez, A. M. Feasibility and reliability  
577 of a physical fitness test battery in individuals with down syndrome. *International Journal of*  
578 *Environmental Research and Public Health*. 2019;16(15).
- 579 36. Ben Saad HP, C.;Tabka, Z.;Mtir, A. H.;Chemit, M.;Hassaoune, R.;Ben Abid, T.;Zara,  
580 K.;Mercier, G.;Zbidi, A.;Hayot, M. 6-minute walk distance in healthy North Africans older  
581 than 40 years: influence of parity. *Respiratory Medicine*. 2009;103(1):74-84.
- 582 37. da Cunha-Filho ITP, D. A.;de Carvalho, A. M.;Campedeli, L.;Soares, M.;de Sousa  
583 Freitas, J. The reliability of walking tests in people with claudication. *Am J Phys Med Rehabil*.  
584 2007;86(7):574-82.
- 585 38. Hanson LCM, H.;Taylor, N. F. The retest reliability of the six-minute walk test in  
586 patients referred to a cardiac rehabilitation programme. *Physiotherapy Research*  
587 *International*. 2012;17(1):55-61.
- 588 39. Nielsen KEN, D. H.;Lin, S.;Fieseler, K. C. R.;Sterling, T. M.;Ver Hoef, R. L.;Knipper, J.  
589 S.;Wilson, J. S.;Foxen, M. F. Changes in exercise responses and tolerance following an eight  
590 week pulmonary rehabilitation program. *Cardiopulmonary Physical Therapy Journal*  
591 *(American Physical Therapy Association, Cardiopulmonary Section)*. 1997;8(4):3-11.
- 592 40. Buch MHD, C. P.;Furst, D. E.;Guillevin, L.;Rubin, L. J.;Wells, A. U.;Matucci-Cerinic,  
593 M.;Riemekasten, G.;Emery, P.;Chadha-Boreham, H.;Charef, P.;Roux, S.;Black, C. M.;Seibold,  
594 J. R. Submaximal exercise testing in the assessment of interstitial lung disease secondary to  
595 systemic sclerosis: Reproducibility and correlations of the 6-min walk test. *Annals of the*  
596 *Rheumatic Diseases*. 2007;66(2):169-73.
- 597 41. Borel BF, C.;Saison, S.;Bart, F.;Grosbois, J. M. An original field evaluation test for  
598 chronic obstructive pulmonary disease population: the six-minute stepper test. *Clinical*  
599 *rehabilitation*. 2010;24(1):82-93.
- 600 42. Nathan SDDB, R. M.;Albera, C.;Bradford, W. Z.;Costabel, U.;Kartashov, A.;Noble, P.  
601 W.;Sahn, S. A.;Valeyre, D.;Weycker, D.;King, T. E. Validation of test performance  
602 characteristics and minimal clinically important difference of the 6-minute walk test in  
603 patients with idiopathic pulmonary fibrosis. *Respiratory Medicine*. 2015;109(7):914-22.
- 604 43. Kervio GC, F.;Ville, N. S. Reliability and intensity of the six-minute walk test in healthy  
605 elderly subjects. *Medicine and Science in Sports and Exercise*. 2003;35(1):169-74.
- 606 44. Correa FRdSA, M. A.;Bianchim, M. S.;Crispim de Aquino, A.;Guerra, R. L.;Dourado, V.  
607 Z. Heart rate variability during 6-min walk test in adults aged 40 years and older.  
608 *International journal of sports medicine*. 2013;34(2):111-5.
- 609 45. Bauman HCA, H. M. Relationship between functional exercise capacity and general  
610 quality of life in nonsurgical patients with lower-extremity peripheral arterial disease.  
611 *Journal of vascular nursing : official publication of the Society for Peripheral Vascular*  
612 *Nursing*. 1997;15(1):21-8.
- 613 46. Kierkegaard MT, A. Reliability and feasibility of the six minute walk test in subjects  
614 with myotonic dystrophy. *Neuromuscul Disord*. 2007;17(11-12):943-9.

- 615 47. Mossberg KA. Reliability of a timed walk test in persons with acquired brain injury.  
616 Am J Phys Med Rehabil. 2003;82(5):385-90; quiz 91-2.
- 617 48. Vancampfort DP, M.;Sweers, K.;Maurissen, K.;Knapen, J.;De Hert, M. Reliability,  
618 minimal detectable changes, practice effects and correlates of the 6-min walk test in  
619 patients with schizophrenia. Psychiatry Research. 2011;187(1-2):62-7.
- 620 49. Gomberg-Maitland MH, D.;Benza, R. L.;McLaughlin, V. V.;Tapson, V. F.;Barst, R. J.  
621 Creation of a model comparing 6-minute walk test to metabolic equivalent in evaluating  
622 treatment effects in pulmonary arterial hypertension. J Heart Lung Transplant.  
623 2007;26(7):732-8.
- 624 50. Jehn MS-T, A.;Schuster, T.;Hanssen, H.;Weis, M.;Halle, M.;Koehler, F. Accelerometer-  
625 based quantification of 6-minute walk test performance in patients with chronic heart  
626 failure: applicability in telemedicine. Journal of Cardiac Failure. 2009;15(4):334-40.
- 627 51. Vancampfort DW, S.;Sienaert, P.;De Hert, M.;Soundy, A.;Rosenbaum, S.;Richards,  
628 J.;Probst, M. Test-retest study of the six-minute walk test in people with bipolar disorder.  
629 Psychiatria Danubina. 2016;28(1):39-44.
- 630 52. Grosbois JMR, C.;Chehere, B.;Coquart, J.;Behal, H.;Bart, F.;Wallaert, B.;Chenivesse, C.  
631 Six-minute stepper test: A valid clinical exercise tolerance test for COPD patients.  
632 International Journal of COPD. 2016;11(1):657-63.
- 633 53. Manali EDL, P.;Triantafillidou, C.;Kolilekas, L. F.;Sotiropoulou, C.;Milic-Emili,  
634 J.;Roussos, C.;Papiris, S. A. MRC chronic Dyspnea Scale: Relationships with cardiopulmonary  
635 exercise testing and 6-minute walk test in idiopathic pulmonary fibrosis patients: a  
636 prospective study. BMC pulm. 2010;10:32.
- 637 54. Bonnevie TA, M.;Prieur, G.;Combret, Y.;Debeaumont, D.;Patout, M.;Cuvelier,  
638 A.;Viacroze, C.;Muir, J. F.;Medrinal, C.;Gravier, F. E. The six-minute stepper test is related to  
639 muscle strength but cannot substitute for the one repetition maximum to prescribe strength  
640 training in patients with COPD. International Journal of Copd. 2019;14:767-74.
- 641 55. Beekman EM, I.;Hendriks, E. J. M.;Klaassen, M. P. M.;Gosselink, R.;van Schayck, O. C.  
642 P.;de Bie, R. A. Course length of 30 metres versus 10 metres has a significant influence on  
643 six-minute walk distance in patients with COPD: An experimental crossover study. Journal of  
644 Physiotherapy. 2013;59(3):169-76.
- 645 56. Eiser NW, D.;Dore, C. J. Reliability, repeatability and sensitivity to change of  
646 externally and self-paced walking tests in COPD patients. Respiratory Medicine.  
647 2003;97(4):407-14.
- 648 57. Berghmans DDL, A. F.;Bastiaenen, C. H.;Ilhan, M.;Lencer, N. H.;Roox, G. M.  
649 Reliability, agreement, and responsiveness of a 6-minute walk/run test in patients with  
650 heart disease. European Journal of Preventive Cardiology. 2013;20(1):135-41.
- 651 58. Granger CLD, L.; Parry, S. M.; Martin, J.; Dimitriadis, T.; Sorohan, M.; Irving, L. Which  
652 field walking test should be used to assess functional exercise capacity in lung cancer? An  
653 observational study. BMC pulm. 2015;15:89.
- 654 59. Hornby BM, Rebecca;Buckley, Lucy;Carson, Kimberley;Gooding, Tiffany;Vernon,  
655 Hilary J. Functional exercise capacity, strength, balance and motion reaction time in Barth  
656 syndrome. Orphanet Journal of Rare Diseases. 2019;14(1):N.PAG-N.PAG.
- 657 60. Modai GS, B.;Bar-Haim, S.;Hutzler, Y. Stair climbing test post-stroke: feasibility,  
658 convergent validity and metabolic, cardiac, and respiratory responses. Topics in stroke  
659 rehabilitation. 2015;22(4):281-8.

- 660 61. Carbonell-Baeza AÁ-G, I. C.;Segura-Jiménez, V.;Castro-Piñero, J.;Ruiz, J. R.;Delgado-  
661 Fernández, M.;Aparicio, V. A. Reliability and Feasibility of Physical Fitness Tests in Female  
662 Fibromyalgia Patients. *International Journal of Sports Medicine*. 2015;36(2):157-62.
- 663 62. Boer PHM, S. J. Test-retest reliability and minimal detectable change scores of  
664 twelve functional fitness tests in adults with Down syndrome. *Research in Developmental*  
665 *Disabilities*. 2016;48:176-85.
- 666 63. Lee RGC, C. Y.;Hsiao, C. C.;Lin, R. Heart rate monitoring systems in groups for  
667 reliability and validity assessment of cardiorespiratory fitness analysis. *Biomedical*  
668 *Engineering - Applications, Basis and Communications*. 2015;27(6).
- 669 64. Giacomantonio NM, P.;Rasmussen, R.;MacKay-Lyons, M. J. Reliability and Validity of  
670 the 6-Minute Step Test for Clinical Assessment of Cardiorespiratory Fitness in People at Risk  
671 of Cardiovascular Disease. *J Strength Cond Res*. 2020;34(5):1376-82.
- 672 65. Hong SHY, H. I.;Kim, D. I.;Gonzales, T. I.;Brage, S.;Jeon, J. Y. Validation of submaximal  
673 step tests and the 6-min walk test for predicting maximal oxygen consumption in young and  
674 healthy participants. *International Journal of Environmental Research and Public Health*.  
675 2019;16(23).
- 676 66. Leung ASC, K. K.;Sykes, K.;Chan, K. S. Reliability, validity, and responsiveness of a 2-  
677 min walk test to assess exercise capacity of COPD patients. *Chest*. 2006;130(1):119-25.
- 678 67. Lee MC. Validity of the 6-minute walk test and step test for evaluation of cardio  
679 respiratory fitness in patients with type 2 diabetes mellitus. *J*. 2018;22(1):49-55.
- 680 68. Rodrigues ADM, Marianna;Nellessen, Aline G.;Hernandes, Nidia A.;Neder, J.  
681 Alberto;Pitta, Fabio. Is the six-minute walk test a useful tool to prescribe high-intensity  
682 exercise in patients with chronic obstructive pulmonary disease? *Heart & Lung*.  
683 2016;45(6):550-6.
- 684 69. Witham MDS, J. A.;Sumukadas, D.;Dryburgh, M.;McMurdo, M. E. A comparison of  
685 the Endurance Shuttle Walk test and the Six Minute Walk test for assessment of exercise  
686 capacity in older people. *Aging Clin Exp Res*. 2012;24(2):176-80.
- 687 70. Kohlbrenner DB, C.;Radtke, T. The 1-Minute Sit-to-Stand Test in Lung Transplant  
688 Candidates: An Alternative to the 6-Minute Walk Test. *Respiratory care*. 2020;65(4):437-43.
- 689 71. Curb JDC-U, C. D.;Rodriguez, B. L.;Grove, J.;Guralnik, J.;Willcox, B. J.;Donlon, T.  
690 A.;Masaki, K. H.;Chen, R. Performance-based measures of physical function for high-function  
691 populations. *Journal of the American Geriatrics Society*. 2006;54(5):737-42.
- 692 72. Magalhaes MGST, J. B.;Santos, A. M. B.;Climaco, D. C. S.;Silva, T. N. S.;Lima, A. M. J.  
693 Construct validity and reproducibility of the six-minute step test in subjects with obstructive  
694 sleep apnea treated with continuous positive airway pressure. *J Bras Pneumol*.  
695 2020;46(3):e20180422.
- 696 73. Vagaggini BT, M.;Severino, S.;Marcello, M.;Antonelli, S.;Brogi, S.;De Simone,  
697 C.;Giardina, A.;Paggiaro, P. L. Shuttle walking test and 6-minute walking test induce a similar  
698 cardiorespiratory performance in patients recovering from an acute exacerbation of chronic  
699 obstructive pulmonary disease. *Respiration*. 2003;70(6):579-84.
- 700 74. Vancampfort D, Vandael H, Hallgren M, Van Damme T. Test-retest reliability and  
701 correlates of the 6-min walk test in people with alcohol use disorders. 2021.
- 702 75. Tsuji K, Matsuoka YJ, Kuchiba A, Suto A, Ochi E. Accuracy of exercise-based tests for  
703 estimating cardiorespiratory fitness and muscle strength in early-stage breast cancer  
704 survivors in Japan. 2022.



- 705 76. Dourado VZ, Nishiaka RK, Simoes M, Lauria VT, Tanni SE, Godoy I, et al. Classification  
706 of cardiorespiratory fitness using the six-minute walk test in adults: Comparison with  
707 cardiopulmonary exercise testing. 2021.
- 708 77. Cheng DK, Nelson M, Brooks D, Salbach NM. Validation of stroke-specific protocols  
709 for the 10-meter walk test and 6-minute walk test conducted using 15-meter and 30-meter  
710 walkways. *Top Stroke Rehabil.* 2020;27(4):251-61.
- 711 78. Kakitsuka EE, Morita AA, Itakussu EY, Kuwahara RM, Anami EHT, Pitta F, et al. Six-  
712 minute walk test in burned subjects: Applicability, reproducibility and performance at  
713 hospital discharge. *Burns.* 2020;46(7):1540-7.
- 714 79. Reyckler GA, N.;Dewulf, S.;Morale Mestre, N.;Caty, G. Validation of 6min step test  
715 and 4-m gait speed in children: A randomized cross-over study. *Gait Posture.* 2018;61:19-24.
- 716 80. Crook SB, G.;Schultz, K.;Lehbert, N.;Jelusic, D.;Keusch, S.;Wittmann, M.;Schuler,  
717 M.;Radtke, T.;Frey, M.;Turk, A.;Puhan, M. A.;Frei, A. A multicentre validation of the 1-min  
718 sit-to-stand test in patients with COPD. *European Respiratory Journal.* 2017;49(3).
- 719 81. Zanini AA, M.;Cherubino, F.;Zampogna, E.;Azzola, A.;Chetta, A.;Spanevello, A. The  
720 one repetition maximum test and the sit-to-stand test in the assessment of a specific  
721 pulmonary rehabilitation program on peripheral muscle strength in COPD patients.  
722 *International Journal of Copd.* 2015;10:2423-30.
- 723 82. Simmonds MJS, Maureen J. Physical function in patients with cancer: psychometric  
724 characteristics and clinical usefulness of a physical performance test battery. *Journal of Pain  
725 & Symptom Management.* 2002;24(4):404-14.
- 726 83. Vancampfort DB, D.;Kimbowa, S.;Firth, J.;Schuch, F.;Van Damme, T.;Mugisha, J. Test-  
727 retest reliability, validity, and correlates of the 2-min walk test in outpatients with  
728 depression. *Physiotherapy research international : the journal for researchers and clinicians  
729 in physical therapy.* 2020;25(2):e1821.
- 730 84. Hansen HB, N.;Frolich, A.;Godtfredsen, N.;Bieler, T. Intra- and inter-rater  
731 reproducibility of the 6-minute walk test and the 30-second sit-to-stand test in patients with  
732 severe and very severe COPD. *International Journal of Copd.* 2018;13:3447-57.
- 733 85. Reilly TT, M. A sub-maximal occupational aerobic fitness test alternative, when the  
734 use of heart rate is not appropriate. *Work (Reading, Mass).* 2010;36(3):333-7.
- 735 86. Hwang RM, N. R.;Mandrusiak, A.;Mudge, A.;Suna, J.;Adsett, J.;Russell, T. Timed Up  
736 and Go Test: A Reliable and Valid Test in Patients With Chronic Heart Failure. *Journal of  
737 Cardiac Failure.* 2016;22(8):646-50.
- 738 87. Ozcan Kahraman BO, I.;Akdeniz, B.;Ozpelit, E.;Sevinc, C.;Acar, S.;Savci, S. Test-retest  
739 reliability and validity of the timed up and go test and 30-second sit to stand test in patients  
740 with pulmonary hypertension. *International Journal of Cardiology.* 2020;304:159-63.
- 741 88. De Camargo AAR, S. Z.;Athanasio, R. A.;Amaral, T. S.;De Cordoba Lanza, F.;Selman, J.  
742 P. R.;Cukier, A.;Fernandes, F. L. A.;Carvalho, C. R. F.;Stelmach, R.;Dal Corso, S. Incremental  
743 shuttle walking test: A reproducible and valid measure of exercise tolerance in adult  
744 subjects with non-cystic fibrosis bronchiectasis (nCF-BCT). *European Respiratory Journal  
745 Conference: European Respiratory Society Annual Congress.* 2013;42(SUPPL. 57).
- 746 89. Bardin MGD, V. Z. Association between the occurrence of falls and the performance  
747 on the incremental shuttle walk test in elderly women. *Brazilian Journal of Physical Therapy.*  
748 2012;16(4):275-80.
- 749 90. Spagnuolo DLJ, S. P.;Iwama, A. M.;Dourado, V. Z. Walking for the assessment of  
750 balance in healthy subjects older than 40 years. *Gerontology.* 2010;56(5):467-73.

- 751 91. Thornton HEW, T. Harcourt. Using simple exercise tests in the field to assess  
752 susceptibility to Acute Mountain Sickness; the Chester Step Test may be a useful predictor.  
753 *Journal of the Royal Naval Medical Service*. 2017;103(3):175-82.
- 754 92. Ang WQ, Tan HT, Goh SM, Seng SW, Huang KS, Chan MY, et al. Chinese (Mandarin)  
755 translation of the incremental shuttle walk test and its validity and reliability: A cross-  
756 sectional study. *Hong Kong Physiotherapy Journal*. 2022;42(02):137-49.
- 757 93. Barbosa RCC, Silva RA, Lunardi AC, Silva STC, Corso SD, Fonseca AJ, et al.  
758 Reproducibility, validity, and reliability of the incremental step test for subjects with  
759 moderate to severe asthma. 2022.
- 760 94. Quintino LF, Aguiar LT, de Brito SAF, Pereira AS, Teixeira-Salmela LF, de Moraes Faria  
761 CDC. Reliability and validity of the incremental shuttle walking test in individuals after  
762 stroke. 2021.
- 763 95. Kon SSP, M. S.;Canavan, J. L.;Clark, A. L.;Jones, S. E.;Nolan, C. M.;Cullinan, P.;Polkey,  
764 M. I.;Man, W. D. Reliability and validity of 4-metre gait speed in COPD. *European*  
765 *Respiratory Journal*. 2013;42(2):333-40.
- 766 96. Jones SE, Kon SS, Canavan JL, Patel MS, Clark AL, Nolan CM, et al. The five-repetition  
767 sit-to-stand test as a functional outcome measure in COPD. *Thorax*. 2013;68(11):1015-20.
- 768 97. Lee ALC, N.;Holland, A. E.;Hill, C. J.;McDonald, C. F.;Burge, A. T.;Rautela,  
769 L.;Thompson, P. J.;Stirling, R. G.;Jenkins, S. Field walking tests are reliable and responsive to  
770 exercise training in people with non'cystic fibrosis bronchiectasis. *Journal of*  
771 *Cardiopulmonary Rehabilitation and Prevention*. 2015;35(6):439-45.
- 772 98. Radtke T, Hebestreit H, Puhan M, Kriemler S. The 1-min sit-to-stand test in cystic  
773 fibrosis - Insights into cardiorespiratory responses. *Journal of Cystic Fibrosis*.  
774 2017;16(6):744-51.
- 775 99. Radtke T, Puhan M, Hebestreit H, Kriemler S. The 1-min sit-to-stand test-A simple  
776 functional capacity test in cystic fibrosis? *Journal of Cystic Fibrosis*. 2016;15(2):223-6.
- 777 100. Reyhler GB, E.;Peran, L.;Pichon, R.;Le Ber-Moy, C.;Ouksel, H.;Liistro, G.;Chambellan,  
778 A.;Beaumont, M. One minute sit-to-stand test is an alternative to 6MWT to measure  
779 functional exercise performance in COPD patients. *Clin Respir J*. 2018;12(3):1247-56.
- 780 101. Gephine S, Bergeron S, Tremblay-Labrecque P-F, Mucci P, Saey D, Maltais F.  
781 Cardiorespiratory Response during the 1-min Sit-to-Stand Test in Chronic Obstructive  
782 Pulmonary Disease. *Med Sci Sports Exerc*. 2020;Publish Ahead of Print:1.
- 783 102. Tarrant BJR, R.;Maitre, C. L.;Poulsen, M.;Corbett, M.;Snell, G.;Thompson, B.  
784 R.;Button, B. M.;Holland, A. E. The Utility of the Sit-to-Stand Test for Inpatients in the Acute  
785 Hospital Setting After Lung Transplantation. *Physical therapy*. 2020;13.
- 786 103. Tremblay Labrecque PF, Harvey J, Nadreau E, Maltais F, Dion G, Saey D. Validation  
787 and Cardiorespiratory Response of the 1-Min Sit-to-Stand Test in Interstitial Lung Disease.  
788 2020.
- 789 104. Levesque JA, A.;Li, P. Z.;Herengt, F.;Brosson, C.;Grosbois, J. M.;Bernady, A.;Bender,  
790 A.;Favre, M.;Guerder, A.;Surpas, P.;Similowski, T.;Aguilaniu, B. Minimal clinically important  
791 difference of 3-minute chair rise test and the DIRECT questionnaire after pulmonary  
792 rehabilitation in COPD patients. *International Journal of Copd*. 2019;14:261-9.
- 793 105. Selig SEG, C. M.;Carlson, J. S. A multi-stage step test protocol for people with low  
794 exercise capacity. *Clinical Kinesiology*. 2000;54(3):67-71.
- 795 106. Dal Corso SD, S. R.;Neder, J. A.;Malaguti, C.;de Fuccio, M. B.;de Castro Pereira, C.  
796 A.;Nery, L. E. A step test to assess exercise-related oxygen desaturation in interstitial lung  
797 disease. *European Respiratory Journal*. 2007;29(2):330-6.

- 798 107. Di Thommazo-Luporini LPC, L.;Luporini, R.;Trimer, R.;Falasco Pantoni, C. B.;Catai, A.  
799 M.;Arena, R.;Borghesi-Silva, A. The six-minute step test as a predictor of cardiorespiratory  
800 fitness in obese women. *European journal of physical and rehabilitation medicine*.  
801 2015;51(6):793-802.
- 802 108. Munari AB, Silva I, Gulart AA, Venancio RS, Klein SR, Zanotto J, et al. Reproducibility  
803 of the 6-Min Step Test in Subjects With COPD. 2021.
- 804 109. Marinho RS, Jurgensen SP, Arcuri JF, Goulart CL, Santos PBD, Roscani MG, et al.  
805 Reliability and validity of six-minute step test in patients with heart failure. 2021.
- 806 110. Cooney JKA, Y. A.;Moore, J. P.;Lemmey, A. B.;Jones, J. G.;Madisson, P. J.;Thom, J. M.  
807 Validity and reliability of the siconolfi step test for estimating cardiorespiratory fitness in  
808 rheumatoid arthritis patients. *Rheumatology*. 2011;50:iii84.
- 809 111. Cooney JKM, J. P.;Ahmad, Y. A.;Jones, J. G.;Lemmey, A. B.;Casanova, F.;Maddison, P.  
810 J.;Thom, J. M. A simple step test to estimate cardio-respiratory fitness levels of rheumatoid  
811 arthritis patients in a clinical setting. *International Journal of Rheumatology*. 2013;2013 (no  
812 pagination).
- 813 112. Lemanska AP, K.;Aning, J. J.;Griffin, B. A.;Manders, R.;Saxton, J. M.;Wainwright,  
814 J.;Faithfull, S. The Siconolfi step test: a valid and reliable assessment of cardiopulmonary  
815 fitness in older men with prostate cancer. *Eur*. 2019;16:1.
- 816 113. Marcora SMC, F.;Fortes, M. B.;Maddison, P. J. Validity and reliability of the Siconolfi  
817 Step Test for assessment of physical fitness in patients with systemic lupus erythematosus.  
818 *Arthritis Rheum*. 2007;57(6):1007-11.
- 819 114. Siconolfi SFG, C. E.;Lasater, T. M.;Carleton, R. A. A simple, valid step test for  
820 estimating maximal oxygen uptake in epidemiologic studies. *American Journal of*  
821 *Epidemiology*. 1985;121(3):382-90.
- 822 115. Jette MS, K.;Quenneville, J.;Landry, F. Relation between cardiorespiratory fitness and  
823 selected risk factors for coronary heart disease in a population of Canadian men and  
824 women. *Cmaj*. 1992;146(8):1353-60.
- 825 116. Beckerman HH, M.;Van Den Akker, L. E.;De Groot, V. The 2-minute walk test is not a  
826 valid method to determine aerobic capacity in persons with Multiple Sclerosis.  
827 *NeuroRehabilitation*. 2019;45(2):239-45.
- 828 117. Reed JLC, L. M.;Cole, C. A.;Harris, J.;Moran, B.;Scott, K.;Terada, T.;Buckley, J. P.;Pipe,  
829 A. L. Submaximal Exercise Testing in Cardiovascular Rehabilitation Settings (BEST Study).  
830 *Frontiers in Physiology*. 2020;10 (no pagination).
- 831 118. Sykes KR, A. The Chester step test -- a simple yet effective tool for the prediction of  
832 aerobic capacity. *Physiotherapy*. 2004;90(4):183-8.
- 833 119. Bland JM AD. Statistical methods for assessing agreement between two methods of  
834 clinical measurement. . *Lancet* 1986;5:307– 10.
- 835 120. Freene N, Pike A, Smith D, Pradhananga A, Toohey K. Criterion Validity of the Older-  
836 adults 2-minute Step Test in Community-dwelling Middle-aged Adults. *Measurement in*  
837 *Physical Education and Exercise Science*. 2021;25(4):335-43.
- 838 121. Chow JLL, Fitzgerald C, Rand S. The 2 min step test: A reliable and valid measure of  
839 functional capacity in older adults post coronary revascularisation. 2022.
- 840 122. de Jesus SFC, Bassi-Dibai D, Pontes-Silva A, da Silva de Araujo A, de Freitas Faria Silva  
841 S, Veneroso CE, et al. Construct validity and reliability of the 2-Minute Step Test (2MST) in  
842 individuals with low back pain. 2022.

- 843 123. Kieu NTVJ, S. J.;Shin, S. W.;Jung, H. W.;Jung, E. S.;Won, Y. H.;Kim, Y. G.;Chae, S. W.  
844 The Validity of the YMCA 3-Minute Step Test for Estimating Maximal Oxygen Uptake in  
845 Healthy Korean and Vietnamese Adults. *J.* 2020;10(1):21-9.
- 846 124. Santo ASG, L. A. Predicting maximum oxygen uptake from a modified 3-minute step  
847 test. *Res Q Exerc Sport.* 2003;74(1):110-5.
- 848 125. Cox MHT, S. G.;Weller, I. M.;Corey, P. Reliability and validity of a fitness assessment  
849 for epidemiological studies. *Canadian journal of sport sciences = Journal canadien des*  
850 *sciences du sport.* 1992;17(1):49-55.
- 851 126. Grant JAJ, A. N.;Campagna, P. D. The prediction of VO<sub>2</sub>max: a comparison of 7  
852 indirect tests of aerobic power. *Journal of Strength & Conditioning Research (Allen Press*  
853 *Publishing Services Inc).* 1999;13(4):346-52.
- 854 127. Tarrant BJ, Robinson R, Le Maitre C, Poulsen M, Corbett M, Snell G, et al. The Utility  
855 of the Sit-to-Stand Test for Inpatients in the Acute Hospital Setting After Lung  
856 Transplantation. 2020.
- 857 128. Lázaro-Martínez S, Orueta-Jiménez TJ, Arias-Vázquez PI, Castillo-Avila RG, Tovilla-  
858 Zárate CA, Hernández-Gil KDC, et al. Reproducibility and safety of the 30" sit to stand test in  
859 individuals with obesity and cardiovascular risk factors. *Obes Res Clin Pract.* 2022;16(6):533-  
860 5.
- 861 129. de Melo ATA, Silva Guimaraes BF, Lapa ESCJR. The five times sit-to-stand test: safety,  
862 validity and reliability with critical care survivors's at ICU discharge. 2022.
- 863 130. Guo YB, J.;Li, Q.;Leavitt, T.;Rosenberg, E. I.;Buford, T. W.;Smith, M. D.;Vincent, H.  
864 K.;Modave, F. A 3-minute test of cardiorespiratory fitness for use in primary care clinics.  
865 *PLoS ONE.* 2018;13(7).
- 866 131. Benton MJA, J. L. Validation of functional fitness tests as surrogates for strength  
867 measurement in frail, older adults with chronic obstructive pulmonary disease. *Am J Phys*  
868 *Med Rehabil.* 2009;88(7):579-83; quiz 84-6, 90.
- 869 132. Puente-Maestu L, Stringer W, Casaburi R. Exercise testing to evaluate therapeutic  
870 interventions in chronic respiratory diseases. *Barcelona Respiratory Network.* 2018;4.
- 871 133. Frost AE, Langleben D, Oudiz R, Hill N, Horn E, McLaughlin V, et al. The 6-min walk  
872 test (6MW) as an efficacy endpoint in pulmonary arterial hypertension clinical trials:  
873 demonstration of a ceiling effect. *Vascul Pharmacol.* 2005;43(1):36-9.
- 874 134. de Camargo AAA, T. S.;Rached, S. Z.;Athanzio, R. A.;Lanza, F. C.;Sampaio, L. M.;de  
875 *Carvalho, C. R.;Cukier, A.;Stelmach, R.;Dal Corso, S. Incremental shuttle walking test: a*  
876 *reproducible and valid test to evaluate exercise tolerance in adults with noncystic fibrosis*  
877 *bronchiectasis. Arch Phys Med Rehabil.* 2014;95(5):892-9.
- 878 135. Diaz-Balboa E, Gonzalez-Salvado V, Rodriguez-Romero B, Martinez-Monzonis A,  
879 Pedreira-Perez M, Cuesta-Vargas AI, et al. Thirty-second sit-to-stand test as an alternative  
880 for estimating peak oxygen uptake and 6-min walking distance in women with breast  
881 cancer: a cross-sectional study. 2022.
- 882 136. Myers J, Bellin D. Ramp exercise protocols for clinical and cardiopulmonary exercise  
883 testing. *Sports Medicine.* 2000;30(1):23-9.
- 884 137. Bayonas-Ruiz A, Muñoz-Franco FM, Ferrer V, Pérez-Caballero C, Sabater-Molina M,  
885 Tomé-Esteban MT, et al. Cardiopulmonary Exercise Test in Patients with Hypertrophic  
886 *Cardiomyopathy: A Systematic Review and Meta-Analysis. Journal of Clinical Medicine.*  
887 2021;10(11):2312.

888

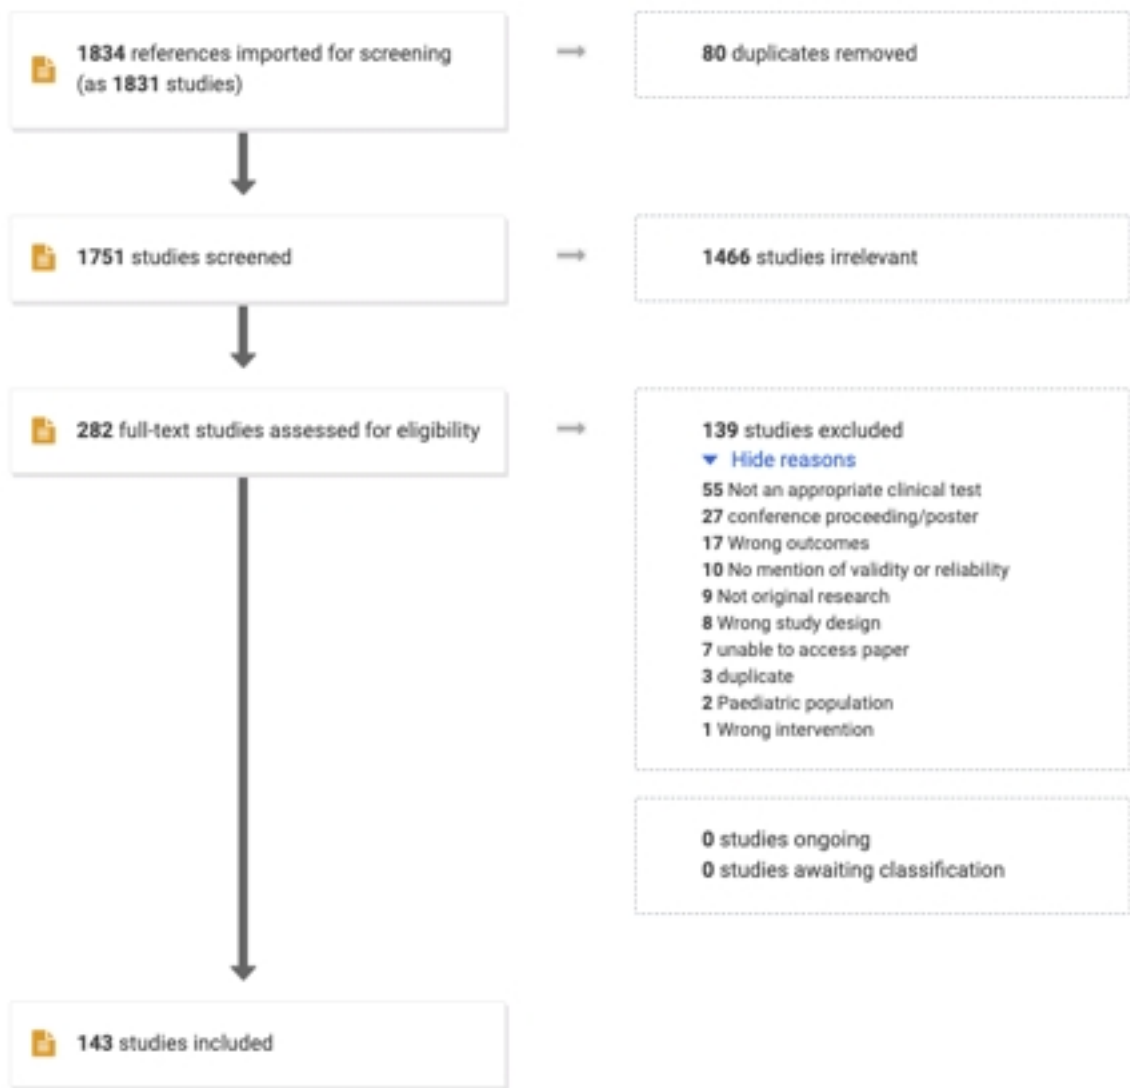

PRISMA diagram

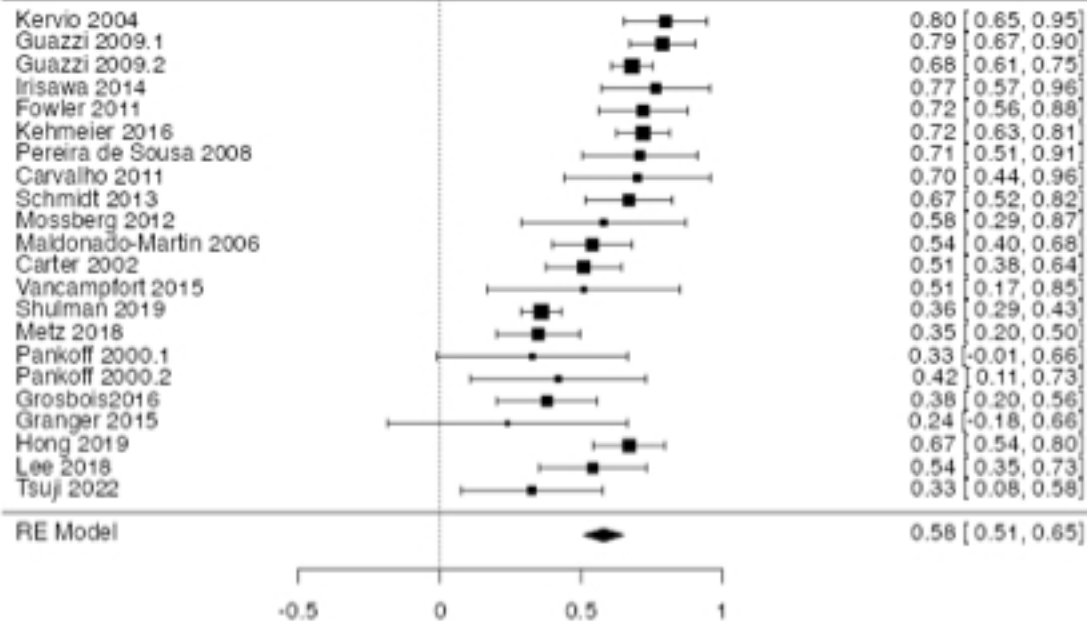

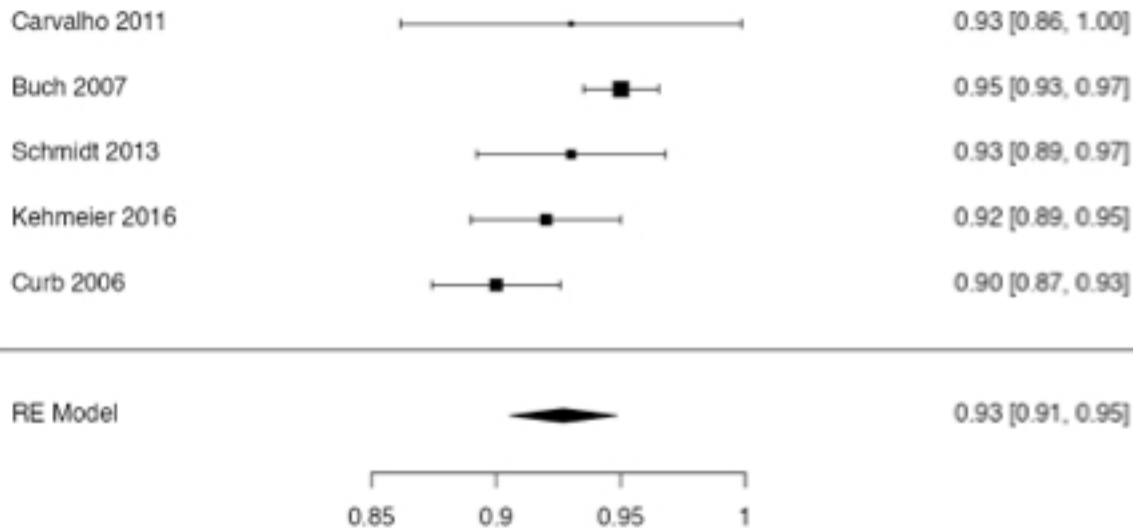





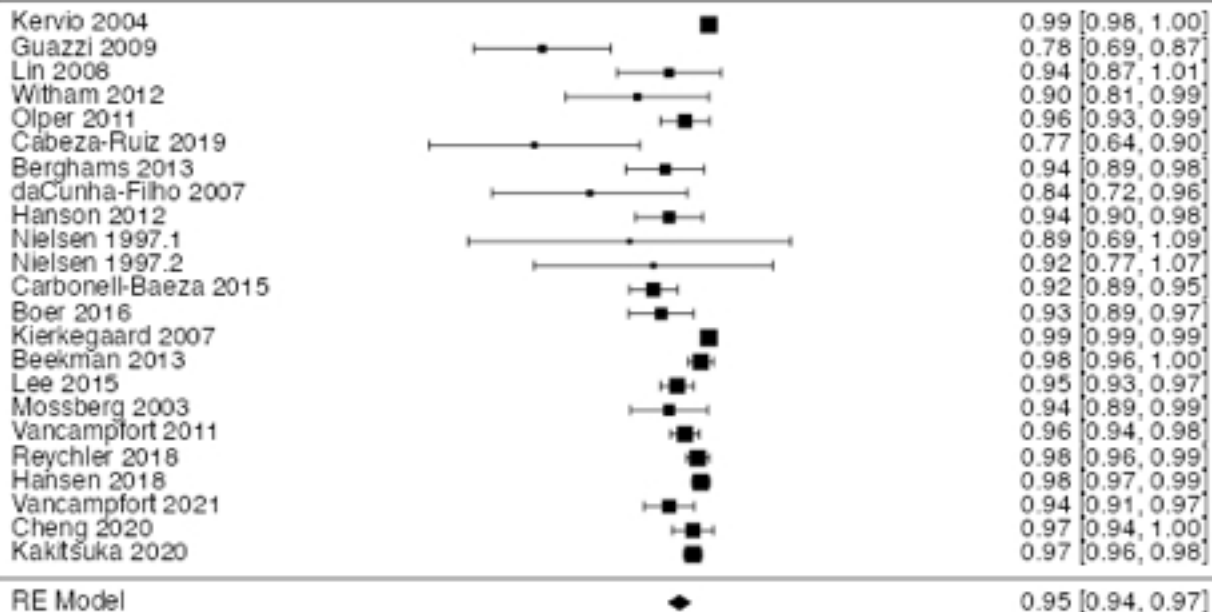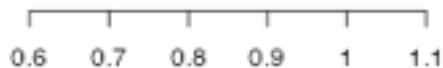















Source: https://medrxiv.org/content/10.1101/2023.03.08.23286976.full.pdf
